# Supplementary material for: Tracking Fecal Bacterial Dispersion from Municipal Wastewater to Peri-Urban Farms during Monsoon Rains in Hue City, Vietnam
Source: MDPI journal article supplement (doi:10.3390/ijerph18189580), 2021-09-11
Supplement: s1 [file s1]

# Supplementary Data

## Impact of Municipal Wastewater on *E. coli* Contamination and its Seasonal Change in Peri-Urban Farms of Hue City, Vietnam

**Table S1.** Average number of *E. coli* in the soil, vegetables, irrigation water, manure and municipal wastewater from Huong Chu (HC), Phu Mau (PM), Quang Thanh (QT) and Toa Kham (TK) communes during a year (May 2018 to April 2019).

| Sample                  | Unit   | 2018                 |                      |                   |                      |                      |                   |                   |                   | 2019                 |                      |                   |                   |
|-------------------------|--------|----------------------|----------------------|-------------------|----------------------|----------------------|-------------------|-------------------|-------------------|----------------------|----------------------|-------------------|-------------------|
|                         |        | May                  | Jun                  | Jul               | Aug                  | Sep                  | Oct               | Nov               | Dec               | Jan                  | Feb                  | Mar               | Apr               |
| <b>Huong Chu (HC)</b>   |        | Dry season           |                      |                   |                      | Wet season           |                   |                   |                   | Dry season           |                      |                   |                   |
| Soil                    | CFU/g  | $2.5 \times 10^1$    | $4.0 \times 10^1$    | $1.6 \times 10^1$ | $0.0 \times 10^0$    | $3.1 \times 10^1$    | $0.0 \times 10^0$ | $3.3 \times 10^0$ | $6.6 \times 10^0$ | $2.0 \times 10^0$    | $1.5 \times 10^1$    | $0.0 \times 10^0$ | $0.0 \times 10^0$ |
| Vegetables              | CFU/g  | $9.8 \times 10^0$    | $0.0 \times 10^0$    | $2.7 \times 10^1$ | $3.3 \times 10^0$    | $0.0 \times 10^0$    | $1.6 \times 10^0$ | $0.0 \times 10^0$ | $0.0 \times 10^0$ | $0.0 \times 10^0$    | $0.0 \times 10^0$    | $0.0 \times 10^0$ | $0.0 \times 10^0$ |
| Irrigation Water        | CFU/ml | $0.0 \times 10^0$    | $1.7 \times 10^0$    | $5.5 \times 10^1$ | $2.0 \times 10^1$    | $7.0 \times 10^0$    | $1.0 \times 10^1$ | $3.5 \times 10^1$ | $1.7 \times 10^1$ | $1.5 \times 10^1$    | $1.8 \times 10^1$    | $1.2 \times 10^1$ | $1.7 \times 10^1$ |
| Manure                  | CFU/g  | -                    | -                    | -                 | -                    | -                    | -                 | -                 | -                 | -                    | -                    | -                 | -                 |
| <b>Phu Mau (PM)</b>     |        |                      |                      |                   |                      |                      |                   |                   |                   |                      |                      |                   |                   |
| Soil                    | CFU/g  | $3.9 \times 10^1$    | $1.8 \times 10^2$    | $3.0 \times 10^0$ | $0.0 \times 10^0$    | $3.0 \times 10^0$    | $3.9 \times 10^1$ | $5.9 \times 10^1$ | $4.6 \times 10^1$ | $0.0 \times 10^0$    | $0.0 \times 10^0$    | $0.0 \times 10^0$ | $0.0 \times 10^0$ |
| Vegetables              | CFU/g  | $7.7 \times 10^{-1}$ | $1.4 \times 10^{-1}$ | $1.0 \times 10^0$ | $0.0 \times 10^0$    | $0.0 \times 10^0$    | $0.0 \times 10^0$ | $0.0 \times 10^0$ | $0.0 \times 10^0$ | $0.0 \times 10^0$    | $5.0 \times 10^0$    | $0.0 \times 10^0$ | $0.0 \times 10^0$ |
| Irrigation Water        | CFU/ml | $2.9 \times 10^1$    | $1.9 \times 10^1$    | $3.0 \times 10^0$ | $1.7 \times 10^1$    | $1.4 \times 10^1$    | $3.0 \times 10^0$ | $4.0 \times 10^0$ | $5.1 \times 10^0$ | $2.4 \times 10^0$    | $3.2 \times 10^1$    | $5.1 \times 10^0$ | $4.3 \times 10^0$ |
| Manure                  | CFU/g  | -                    | -                    | -                 | -                    | -                    | -                 | -                 | $1.7 \times 10^3$ | -                    | -                    | -                 | -                 |
| <b>Quang Thanh (QT)</b> |        |                      |                      |                   |                      |                      |                   |                   |                   |                      |                      |                   |                   |
| Soil                    | CFU/g  | $4.0 \times 10^1$    | $1.6 \times 10^1$    | $1.3 \times 10^1$ | $0.0 \times 10^0$    | $3.0 \times 10^0$    | $8.8 \times 10^1$ | $1.5 \times 10^1$ | $3.7 \times 10^1$ | $0.0 \times 10^0$    | $2.9 \times 10^2$    | $1.7 \times 10^3$ | $2.8 \times 10^2$ |
| Vegetables              | CFU/g  | $1.7 \times 10^0$    | $4.6 \times 10^{-1}$ | $1.2 \times 10^0$ | $4.2 \times 10^{-1}$ | $3.0 \times 10^{-1}$ | $0.0 \times 10^0$ | $1.3 \times 10^2$ | $3.8 \times 10^0$ | $1.0 \times 10^{-1}$ | $3.5 \times 10^{-1}$ | $1.4 \times 10^0$ | $1.2 \times 10^0$ |
| Irrigation Water        | CFU/ml | $9.8 \times 10^1$    | $6.7 \times 10^0$    | $2.5 \times 10^1$ | $7.1 \times 10^0$    | $1.9 \times 10^1$    | $9.3 \times 10^0$ | $7.7 \times 10^0$ | $6.9 \times 10^0$ | $1.1 \times 10^1$    | $8.2 \times 10^0$    | $7.3 \times 10^1$ | $7.0 \times 10^1$ |

|                      |        |   |                   |   |   |   |   |   |                   |   |   |   |   |
|----------------------|--------|---|-------------------|---|---|---|---|---|-------------------|---|---|---|---|
| Manure               | CFU/g  | - | -                 | - | - | - | - | - | $1.2 \times 10^1$ | - | - | - | - |
| <b>Toa Kham (TK)</b> |        |   |                   |   |   |   |   |   |                   |   |   |   |   |
| Wastewater           | CFU/ml | - | $4.0 \times 10^4$ | - | - | - | - | - | $1.3 \times 10^3$ | - | - | - | - |

**Note:** - = no samples

**Table S2:** Sequence Type (ST) and Sequence Type Complex (ST Complex) identity of *E. coli* isolates collected during the study and their reported phylogroup

| Dry Season  |       |            |               | Wet Season   |       |            |                     |
|-------------|-------|------------|---------------|--------------|-------|------------|---------------------|
| Isolate     | ST    | ST Complex | Phylogroup    | Isolate      | ST    | ST Complex | Reported Phylogroup |
| SOL-1 HC4   | 939   | None       | <u>A</u>      | MNR-1 QT1    | 4681  | 469        | <u>B1</u>           |
| SOL-1 QT2   | 196   | None       | <u>B1</u>     | MNR-10 PM5   | 10017 | None       | -                   |
| SOL-1 QT3   | 10862 | None       | -             | MNR-2 PM5    | 9872  | None       | -                   |
| SOL-3 QT2   | 196   | None       | <u>B1</u>     | MNR-2 QT1    | 10012 | None       | -                   |
| SOL-6 PMc   | 3640  | None       | <u>B1</u>     | MNR-3 PM5    | 641   | 86         | D, <u>B1</u> , A    |
| SOL-1 HC1-1 | 10355 | None       | -             | MNR-3 QT1    | 10013 | None       | -                   |
| SOL-1 HC4   | 10356 | None       | -             | MNR-4 PM5    | 10008 | None       | -                   |
| SOL-1 PM2   | 10357 | None       | -             | MNR-4 QT1    | 10026 | None       | -                   |
| SOL-1 PMc   | 10677 | None       | -             | MNR-5 PM5    | 10008 | None       | -                   |
| SOL-2 HC4   | 10358 | None       | -             | MNR-5 QT1    | 48    | 10         | E, <u>A</u>         |
| SOL-2 QT2   | 10678 | None       | -             | MNR-6 PM5    | 10014 | None       | -                   |
| SOL-3 HC1-1 | 10679 | None       | -             | MNR-6 QT1    | 10012 | None       | -                   |
| SOL-3 HC4   | 10359 | None       | -             | MNR-7 PM5    | 48    | 10         | E, <u>A</u>         |
| SOL-3 PMc   | 10360 | None       | -             | MNR-7 QT1    | 10015 | None       | -                   |
| SOL-4 HC4   | 10362 | None       | -             | MNR-8 PM5    | 10016 | None       | -                   |
| SOL-4 PMc   | 10361 | None       | -             | MNR-8 QT1    | 48    | 10         | E, <u>A</u>         |
| VEG-1 PM1   | 9967  | 446        | <u>B1</u>     | MNR-9 PM5    | 641   | 86         | D, <u>B1</u> , A    |
| VEG-1 QT1   | 10363 | None       | -             | MNR-9 QT1    | 48    | 10         | E, <u>A</u>         |
| VEG-1 QT4   | 10681 | None       | -             | SOL-1 PM2    | 10018 | None       | -                   |
| VEG-1 QT5   | 10364 | None       | -             | SOL-1 QT1    | 10019 | None       | -                   |
| VEG-11 HC5  | 5044  | None       | <u>B1</u> , A | SOL-10 PM2   | 1148  | None       | <u>B1</u>           |
| VEG-13 HC5  | 10867 | None       | -             | SOL-2 QT1    | 10021 | None       | -                   |
| VEG-14 HC5  | 533   | 40         | <u>B1</u>     | SOL-3 PM2    | 1148  | None       | <u>B1</u>           |
| VEG-15 HC5  | 181   | 168        | <u>A</u>      | SOL-3 QT1    | 10020 | None       | -                   |
| VEG-16 HC5  | 10867 | None       | -             | SOL-4 PM2    | 1148  | None       | <u>B1</u>           |
| VEG-2 HC5   | 8369  | None       | <u>B1</u>     | SOL-5 HC3    | 10022 | None       | -                   |
| VEG-2 PM1   | 10365 | None       | -             | SOL-5 PM2    | 1148  | None       | <u>B1</u>           |
| VEG-2 PM1   | 10863 | None       | -             | SOL-6 PM2    | 1148  | None       | <u>B1</u>           |
| VEG-2 QT5   | 10680 | None       | -             | SOL-7 PM2    | 4088  | None       | <u>B1</u>           |
| VEG-3 HC5   | 10864 | None       | -             | IRW-1 HC     | 175   | None       | <u>A</u>            |
| VEG-3 QT1   | 10866 | None       | -             | IRW-1 PM2    | 10023 | None       | -                   |
| VEG-3 QT5   | 10682 | None       | -             | IRW-1 PM3    | 533   | 40         | <u>B1</u>           |
| VEG-4 HC5   | 5229  | 101        | <u>B1</u>     | IRW-1 QT3+5  | 10024 | None       | -                   |
| VEG-5 HC5   | 10867 | None       | -             | IRW-1 QT4    | 10025 | None       | -                   |
| VEG-5 QT1   | 10868 | None       | -             | IRW-10 HC    | 181   | 168        | <u>A</u>            |
| VEG-7 HC5   | 542   | None       | <u>A</u>      | IRW-10 QT3+5 | 10033 | None       | -                   |
| VEG-8 HC5   | 181   | 168        | <u>A</u>      | IRW-11 HC    | 10034 | None       | -                   |
| IRW-1 HC4+5 | 2522  | None       | <u>B1</u>     | IRW-12 QT3+5 | 165   | 165        | D, <u>A</u>         |
| IRW-1 PM2   | 10687 | None       | -             | IRW-13 QT4   | 711   | None       | <u>B1</u>           |
| IRW-1 PM3   | 10366 | None       | -             | IRW-14 QT3+5 | 101   | 101        | D, <u>B1</u> , A    |

|              |       |      |                                 |              |       |      |                                   |
|--------------|-------|------|---------------------------------|--------------|-------|------|-----------------------------------|
| IRW-1 QT1    | 10869 | None | -                               | IRW-14 QT4   | 40    | 40   | <u>B1</u>                         |
| IRW-1 QT2    | 10683 | None | -                               | IRW-16 QT3+5 | 394   | 394  | E or clade I, <u>D</u> , <u>A</u> |
| IRW-1 QT2    | 161   | None | <u>A</u>                        | IRW-19 QT3+5 | 4577  | None | <u>B1</u>                         |
| IRW-1 QT3    | 10367 | None | -                               | IRW-2 HC     | 7366  | None | <u>A</u>                          |
| IRW-1 QT4    | 409   | None | B1 and <u>A</u>                 | IRW-2 PM2    | 10027 | None | -                                 |
| IRW-10 HC4+5 | 10880 | None | -                               | IRW-2 QT2    | 401   | None | <u>A</u>                          |
| IRW-11 HC4+5 | 10878 | None | -                               | IRW-2 QT4    | 10028 | None | -                                 |
| IRW-12 HC4+5 | 10881 | None | -                               | IRW-20 QT3+5 | 155   | 155  | <u>B1</u> , <u>A</u>              |
| IRW-13 HC4+5 | 3106  | 155  | -                               | IRW-3 PM2    | 10027 | None | -                                 |
| IRW-14 HC4+5 | 1727  | 446  | <u>B1</u>                       | IRW-3 PM3    | 93    | 168  | E, <u>D</u> , <u>A</u>            |
| IRW-17 HC4+5 | 10882 | None | -                               | IRW-3 QT2    | 6836  | 165  | <u>A</u>                          |
| IRW-18 HC4+5 | 10879 | None | -                               | IRW-3 QT4    | 10029 | None | -                                 |
| IRW-19 HC4+5 | 58    | 155  | <u>B1</u> , <u>A</u>            | IRW-4 HC     | 10030 | None | -                                 |
| IRW-2 HC1    | 1656  | None | <u>B1</u> , <u>A</u>            | IRW-4 PM2    | 1056  | None | <u>B1</u>                         |
| IRW-2 PM2    | 10688 | None | -                               | IRW-5 HC     | 155   | 155  | <u>B1</u> , <u>A</u>              |
| IRW-2 PM3    | 202   | None | <u>A</u>                        | IRW-5 PM2    | 1056  | None | <u>B1</u>                         |
| IRW-2 QT1    | 10870 | None | -                               | IRW-5 QT4    | 10031 | None | -                                 |
| IRW-2 QT2    | 161   | None | <u>A</u>                        | IRW-6 PM2    | 10027 | None | -                                 |
| IRW-2 QT3    | 10684 | None | -                               | IRW-6 QT3+5  | 196   | None | <u>B1</u>                         |
| IRW-3 PM2    | 10688 | None | -                               | IRW-6 QT4    | 6856  | 10   | <u>A</u>                          |
| IRW-3 QT1    | 10865 | None | -                               | IRW-7 HC     | 181   | 168  | <u>A</u>                          |
| IRW-3 QT2    | 161   | None | <u>A</u>                        | IRW-7 PM2    | 10027 | None | -                                 |
| IRW-3 QT3    | 10368 | None | -                               | IRW-7 QT4    | 10032 | None | -                                 |
| IRW-4 PM2    | 10685 | None | -                               | IRW-8 HC     | 181   | 168  | <u>A</u>                          |
| IRW-4 QT1    | 10871 | None | -                               | IRW-8 PM2    | 10027 | None | -                                 |
| IRW-4 QT3    | 10369 | None | -                               | IRW-8 QT3+5  | 10033 | None | -                                 |
| IRW-5 HC4+5  | 10872 | None | -                               | IRW-9 PM2    | 6109  | None | <u>B1</u>                         |
| IRW-5 PM2    | 10689 | None | -                               | IRW-9 QT4    | 5229  | 101  | <u>B1</u>                         |
| IRW-5 QT1    | 10873 | None | -                               | MWW-1        | 205   | 205  | <u>B1</u>                         |
| IRW-5 QT3    | 10370 | None | -                               | MWW-10       | 10037 | None | -                                 |
| IRW-6 HC4+5  | 10874 | None | -                               | MWW-12       | 48    | 10   | E, <u>A</u>                       |
| IRW-6 QT1    | 10865 | None | -                               | MWW-13       | 10038 | None | -                                 |
| IRW-6 QT3    | 10371 | None | -                               | MWW-15       | 200   | 40   | <u>B1</u>                         |
| IRW-7 HC4+5  | 10875 | None | -                               | MWW-16       | 3202  | None | <u>A</u>                          |
| IRW-7 QT3    | 10372 | None | -                               | MWW-18       | 3240  | None | -                                 |
| IRW-8 HC4+5  | 10876 | None | -                               | MWW-20       | 1139  | None | <u>A</u>                          |
| IRW-9 HC4+5  | 10877 | None | -                               | MWW-21       | 746   | 10   | <u>A</u>                          |
| MWW-1 TK     | 10686 | None | -                               | MWW-22       | 10039 | None | -                                 |
| MWW-10 TK    | 10    | 10   | E or clade I, C, <u>A</u>       | MWW-23       | 10040 | None | -                                 |
| MWW-11 TK    | 409   | None | B1 and <u>A</u>                 | MWW-27       | 3856  | None | <u>A</u>                          |
| MWW-12 TK    | 10    | 10   | E or clade I, C, <u>A</u>       | MWW-28       | 218   | 10   | E, <u>A</u>                       |
| MWW-13 TK    | 641   | 86   | <u>D</u> , <u>B1</u> , <u>A</u> | MWW-29       | 10041 | None | -                                 |
| MWW-14 TK    | 10379 | None | -                               | MWW-3        | 130   | 31   | <u>E</u>                          |
| MWW-15 TK    | 218   | 10   | E, <u>A</u>                     | MWW-4        | 10035 | None | -                                 |
| MWW-2 TK     | 10    | 10   | E or clade I, C, <u>A</u>       | MWW-6        | 95    | 95   | <u>B2</u> , <u>B1</u>             |

|          |       |      |                |       |       |      |                |
|----------|-------|------|----------------|-------|-------|------|----------------|
| MWW-3 TK | 10375 | None | -              | MWW-7 | 10036 | None | -              |
| MWW-4 TK | 3489  | 10   | <u>A</u>       | MWW-9 | 93    | 168  | E, D, <u>A</u> |
| MWW-5 TK | 10691 | None | -              |       |       |      |                |
| MWW-6 TK | 10376 | None | -              |       |       |      |                |
| MWW-9 TK | 93    | 168  | E, D, <u>A</u> |       |       |      |                |

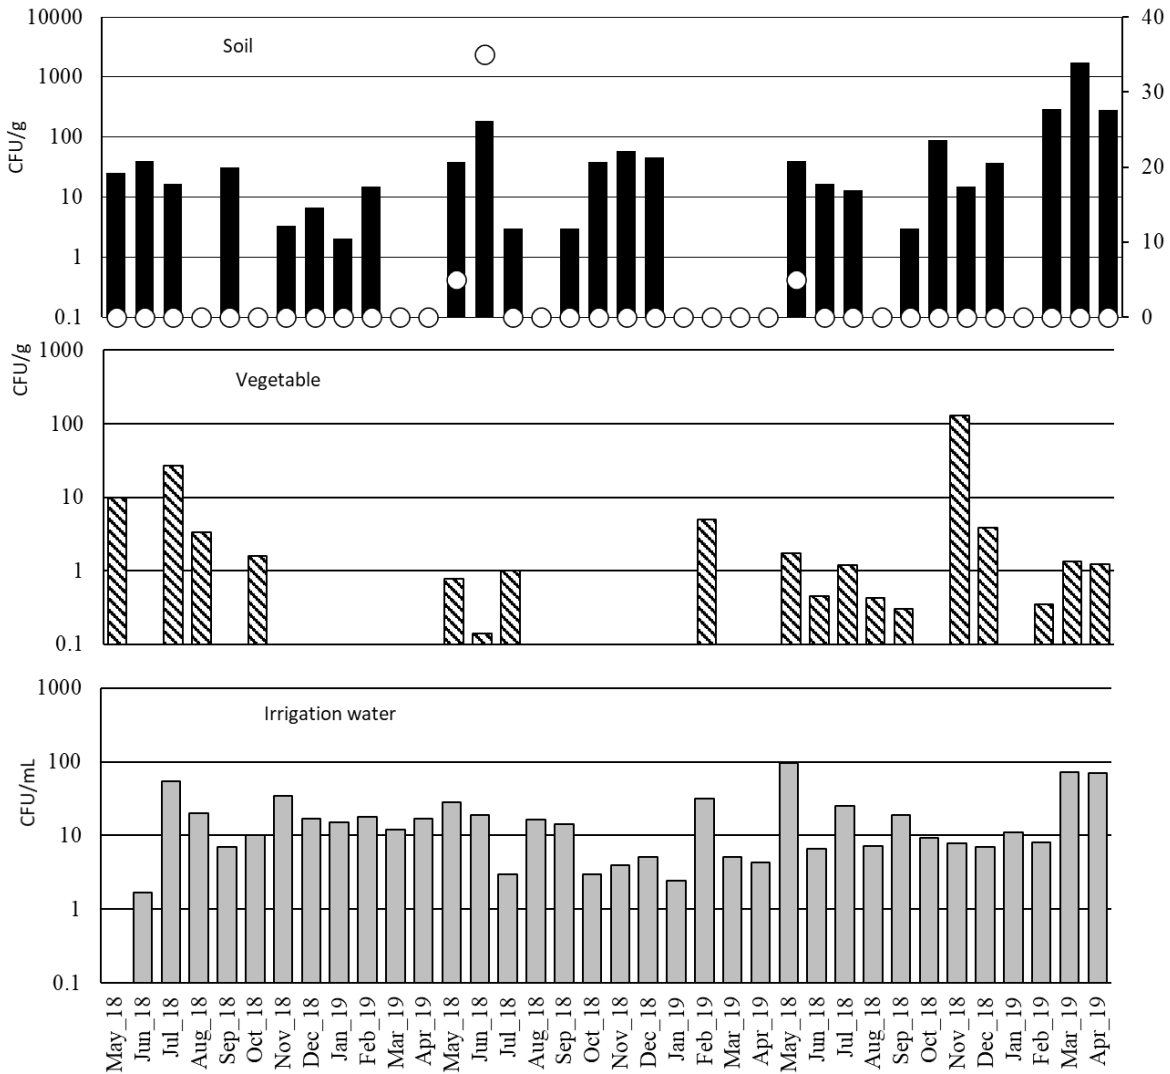

Figure S1. *E.coli* loads in soil, vegetable and irrigation water from all the sites throughout the sampling season. The open circles are for soil control samples plotted on the secondary axis
